# Supplementary material for: Enantiodetermining processes in the synthesis of alanine, serine, and isovaline
Source: Royal Society of Chemistry journal article supplement (doi:10.1039/d3cp03212d), 2023-01-01
Supplement: d3cp03212d1.csv [file d3cp03212d1.csv]

Electronic Energy (EE)
M06-2X/6-31G(d,p)
With H
A1		EE/Hartree
RC0		-0.496666
		-209.134923
TS1		-209.616525
TS1'		-209.616525
IM1		-209.659471
IM1'		-209.659471
RC1		-324.123184
TS2		-324.100204
TS2'		-324.100204
IM2		-324.13075
IM2'		-324.13075
TS3		-324.091207
TS3'		-323.994323
IM3		-324.166862
IM3'		-324.166862
TS4		-324.021913
TS4'		-324.021913
L-Ala		-323.630341
D-Ala		-323.630341
A2		EE/Hartree
RC0		-0.496666
		-114.454658
TS1		-114.936519
IM1		-114.986489
RC1		-324.154413
TS2		-324.133815
IM2		-324.140802
TS3		-324.098836
IM3		-324.157151
TS4		-324.111653
IM4		-324.189799
TS5		-324.0777
TS5'		-324.0777
IM5		-324.157441
IM5'		-324.157441
TS6		-324.11437
TS6'		-324.11437
L-Ala		-323.630341
D-Ala		-323.630341
A3		EE/Hartree
RC0		-0.496666
		-209.134923
TS1		-209.607225
IM1		-209.651881
TS2		-209.608577
IM2		-209.621284
TS3		-209.612865
TS3'		-209.612865
IM3		-209.641731
IM3'		-209.641731
RC3		-324.107015
TS4		-324.093655
TS4'		-324.093655
IM4		-324.126499
IM4'		-324.126499
TS5		-324.091207
TS5'		-324.091207
IM5		-324.166861
IM5'		-324.166861
TS6		-324.11437
TS6'		-324.11437
L-Ala		-323.630341
D-Ala		-323.630341
B1		EE/Hartree
RC0		-0.496666
		-170.763472
TS1		-171.253122
IM1		-171.322298
RC1		-247.728132
TS2		-247.691764
IM2		-247.707433
TS3		-247.696415
IM3		-247.748323
TS4		-247.679987
IM4		-247.758474
TS5		-247.702928
TS5'		-247.702928
IM5		-247.774531
IM5'		-247.774531
RC5		-324.18049
TS6		-324.099247
TS6'		-324.099247
IM6		-324.099247
IM6'		-324.099247
TS7		-324.120297
TS7'		-324.120297
IM7		-324.121593
IM7'		-324.121593
TS8		-324.112431
TS8'		-324.112431
L-Ala		-323.628175
D-Ala		-323.628174
B2		EE/Hartree
RC0		-0.496666
		-170.763472
TS1		-171.253122
IM1		-171.322298
RC1		-247.728132
TS2		-247.691764
IM2		-247.707433
TS3		-247.696415
IM3		-247.748323
TS4		-247.679987
IM4		-247.758474
TS5		-247.702928
IM5		-247.774531
TS6		-247.665488
TS6'		-247.665488
IM6		-247.745648
IM6'		-247.745648
RC6		-324.149449
TS7		-324.078955
TS7'		-324.078955
L-Ala		-323.630341
D-Ala		-323.630341
B3		EE/Hartree
RC0		-0.496666
		-170.763472
TS1		-171.257503
IM1		-171.339995
RC1		-247.74504
TS2		-247.692591
IM2		-247.707433
TS3		-247.696415
IM3		-247.748323
TS4		-247.679987
IM4		-247.758464
TS5		-247.66056
TS5'		-247.66056
IM5		-247.700324
IM5'		-247.700324
RC5		-324.105134
TS6		-324.092175
TS6'		-324.092175
IM6		-324.153672
IM6'		-324.153672
TS7		-324.078955
TS7'		-324.078955
L-Ala		-323.630341
D-Ala		-323.630341
C		EE/Hartree
RC0		-0.496666
		-209.134923
TS1		-209.607225
IM1		-209.651881
TS2		-209.60149
IM2		-209.659401
RC2		-399.371798
TS3		-399.318598
IM3		-398.833113
TS4		-399.308856
IM4		-399.33035
TS5		-398.122804
IM5		-398.147538
TS6		-398.135743
TS6'		-398.135743
IM6		-398.185524
IM6'		-398.185524
RC6		-399.355056
TS7		-399.311181
TS7'		-399.311181
L-Ser		-398.81999
D-Ser		-398.81999
D		EE/Hartree
RC0		-0.496666
		-171.995576
TS1		-172.483613
IM1		-172.538622
RC1		-402.711453
TS2		-402.679249
IM2		-402.706498
TS3		-402.694711
IM3		-402.722352
TS4		-402.682341
IM4		-402.732566
TS5		-402.685394
IM5		-402.741058
TS6		-402.65379
IM6		-402.740087
TS7		-402.677659
IM7		-402.753364
TS8		-402.69712
IM8		-402.717742
TS9		-402.697459
TS9'		-402.697459
IM9		-402.75622
IM9'		-402.75622
TS10		-402.710072
TS10'		-402.710072
L-Isov		-402.224606
D-Isov		-402.224606
Without H
A		EE/Hartree
RC0		-323.599402
TS1		-323.516595
IM1		-323.597139
TS2		-210.223314
IM2		-210.301883
TS3		-323.510971
Ala		-323.628379
B		EE/Hartree
RC0		-247.169206
TS1		-247.07538
IM1		-247.175384
TS2		-247.071931
IM2		-247.154351
TS3		-323.500395
Ala		-323.620794
C		EE/Hartree
RC0		-398.849699
TS1		-398.80761
IM1		-398.812622
TS2		-398.658772
IM2		-398.811541
TS3		-398.706338
Ser		-398.817105
D		EE/Hartree
RC0		-402.168306
TS1		-402.062553
IM1		-402.133599
TS2		-402.115149
IM2		-402.176506
TS3		-402.055744
IM3		-402.185344
TS4		-402.087701
IM4		-402.189981
TS5		-402.062493
Isov		-402.223706
