# Supplementary material for: Enantiodetermining processes in the synthesis of alanine, serine, and isovaline
Source: Royal Society of Chemistry journal article supplement (doi:10.1039/d3cp03212d), 2023-01-01
Supplement: d3cp03212d2.csv [file d3cp03212d2.csv]

Vibrations frequency
M06-2X/6-31+G(d,p)
With H
A1		V1	V2	V3	V4	V5
RC0		21.98	213.67	433.68	520.29	551.3
TS1		-1362.06	107.37	172.05	235.56	400.04
TS1'		-1362.09	107.06	172	235.51	400.02
IM1		141.59	200.73	375.39	392.62	425.05
IM1'		141.59	200.73	375.39	392.62	425.05
RC1		46.58	66.88	80.89	92.3	146.46
TS2		-1672.36	62.64	103.84	129.31	191.08
TS2'		-1672.39	62.61	103.86	129.32	191.11
IM2		45.35	86.89	108.12	121.24	168.28
IM2'		45.35	86.89	108.12	121.24	168.28
TS3		-595.57	105.22	147.13	234.59	274.99
TS3'		-595.57	105.23	147.12	234.59	274.96
IM3		57.86	94.39	150.29	168.99	179.03
IM3'		57.86	94.39	150.29	168.99	179.03
TS4		-1064.45	95.36	233.65	249.95	262.34
TS4'		-1064.45	95.35	233.66	249.65	262.05
L-Ala		45.51	220.09	226.7	249.16	310.33
D-Ala		45.51	220.09	226.7	249.16	310.33
A2		V1	V2	V3	V4	V5
RC0		1209.21	1271.13	1544.93	1877.8	2963.03
TS1		-1458.77	142.88	575.09	1110.92	1246.04
IM1		429.04	641.11	1059.26	1246.44	1350.07
RC1		33.07	39.63	71.48	98.31	110.95
TS2		-362.62	146.41	219.59	243.37	255
IM2		147.66	213.56	217.5	262.98	301.97
TS3		-1727.58	145.23	209.95	254.74	290.08
IM3		138.93	240.98	249.26	290.63	352.56
TS4		-1311.09	137.18	172.43	236.17	322.22
IM4		60.64	126.76	153.68	193.25	223.28
TS5		-1380.77	116.36	176.74	218.1	259.97
TS5'		-1381.44	116.2	176.47	217.24	259.37
IM5		48.58	56.41	67.82	90.48	127.16
IM5'		48.58	56.41	67.82	90.48	127.16
TS6		-1064.45	95.36	233.65	249.95	262.34
TS6'		-1064.47	95.41	233.94	249.64	262.04
L-Ala		45.55	220.08	226.69	249.16	310.33
D-Ala		45.55	220.08	226.69	249.16	310.33
A3		V1	V2	V3	V4	V5
RC0		21.98	213.67	433.68	520.29	551.3
TS1		-1421.73	166.86	295.25	389.54	451.69
IM1		59.69	86.73	109.48	128.15	159.72
TS2		-1231.41	28.14	78.95	111.36	213.52
IM2		70.24	74.16	103.16	147.59	156.93
TS3		-428.5	200.29	221.1	266.52	380.81
TS3'		-428.49	200.02	221.1	266.49	380.79
IM3		242.65	344.61	362.44	395.78	518.77
IM3'		242.65	344.61	362.44	395.78	518.77
RC3		56.31	75.68	98.96	128.77	172.62
TS4		-987.93	29.19	78.67	95.24	229.86
TS4'		-987.94	29.44	78.85	95.28	229.88
IM4		31.26	50.47	59.94	121.8	186
IM4'		31.26	50.47	59.94	121.8	186
TS5		-595.57	105.22	147.13	234.59	274.99
TS5'		-595.57	105.23	147.13	234.75	274.98
IM5		57.87	94.15	150.31	169.01	179.1
IM5'		57.87	94.15	150.31	169.01	179.1
TS6		-1064.45	95.36	233.65	249.95	262.34
TS6'		-1064.47	95.41	233.94	249.64	262.04
L-Ala		45.51	220.59	226.68	249.25	310.46
D-Ala		45.51	220.59	226.68	249.25	310.46
B1		V1	V2	V3	V4	V5
RC0		234.36	354.4	579.2	717.97	889.99
TS1		-940.65	231.2	318.44	432.8	471.98
IM1		40.04	204.78	370.42	475.04	588.21
RC1		92.28	106.1	136.35	150.4	165.45
TS2		-1235.87	82.18	118.31	216.79	259.93
IM2		77.29	104.54	142.65	173.58	216.98
TS3		-630.66	83.78	212.24	217.73	224.04
IM3		80.41	220.04	249.85	408.87	474.94
TS4		-2042.55	170.93	184.96	240.34	446.75
IM4		46.61	154.55	252.75	503.35	529.69
TS5		-1991.02	73.44	134.51	241	378.29
IM5		85.21	136.31	221.94	269.29	461.64
RC5		37.96	66.89	72.85	120.67	133.8
TS6		-892.28	77.47	103.56	226.37	233.84
IM6		27.82	82.15	106.8	126.68	152.82
TS7		-678.47	88.33	167.02	211.87	223.33
TS7'		-678.48	88.33	167.04	211.86	223.29
IM7		79.96	197.09	226.95	235.19	323.67
IM7'		79.82	196.7	226.47	235	323.57
TS8		-1496.49	66.15	225.46	237.14	274.17
TS8'		-1496.48	66.15	225.47	237.16	274.23
L-Ala		20.36	227.54	255	288.82	321.18
D-Ala		22.49	228.28	253.78	289.51	319.82
B2		V1	V2	V3	V4	V5
RC0		234.36	354.4	579.2	717.97	889.99
TS1		-940.65	231.2	318.44	432.8	471.98
IM1		40.04	204.78	370.42	475.04	588.21
RC1		92.28	106.1	136.35	150.4	165.45
TS2		-1235.87	82.18	118.31	216.79	259.93
IM2		77.29	104.54	142.65	173.58	216.98
TS3		-630.66	83.78	212.24	217.73	224.04
IM3		80.41	220.04	249.85	408.87	474.94
TS4		-2042.55	170.93	184.96	240.34	446.75
IM4		46.61	154.55	252.75	503.35	529.69
TS5		-1991.02	73.44	134.51	241	378.29
IM5		85.21	136.31	221.94	269.29	461.64
TS6		-1001.68	114.55	184.16	286.68	401.38
TS6'		-1001.66	114.76	184.17	286.7	401.38
IM6		59.63	238.15	262.38	292.67	385.19
IM6'		59.63	238.15	262.38	292.67	385.19
RC6		52.81	79.54	100.27	136.4	145.58
TS7		-1764.48	85.76	224.99	230.38	255.88
TS7'		-1764.48	85.77	225.18	230.44	255.68
L-Ala		45.6	219.98	226.66	249.15	310.33
D-Ala		45.6	219.98	226.66	249.15	310.33
B3		V1	V2	V3	V4	V5
RC0		234.36	354.4	579.2	717.97	889.99
TS1		-645.94	198.3	246.16	321.43	420.48
IM1		25	221.34	420.88	576.68	580.28
RC1		42.3	69.91	104.94	121.62	142.53
TS2		-975.08	70.26	103.5	138.37	207.08
IM2		77.05	104.07	141.98	168.59	216.82
TS3		-630.66	83.78	212.24	217.73	224.04
IM3		80.41	220.04	249.85	408.87	474.94
TS4		-2042.55	170.93	184.96	240.34	446.75
IM4		46.35	152.91	258.29	503.9	528.25
TS5		-1163.36	92.78	220.99	301.43	353.86
TS5'		-1163.36	92.93	221.01	301.43	353.87
IM5		173.04	209.92	296.61	377.29	525.29
IM5'		173.04	209.92	296.61	377.29	525.29
RC5		38.16	97.78	152.42	156.3	197.02
TS6		-1509.61	110.65	183.42	218.42	389.17
TS6'		-1499.82	113.8	211.53	244.38	319.9
IM6		53.71	83.95	156.33	165.84	176.67
IM6'		53.71	83.95	156.33	165.84	176.67
TS7		-1764.51	85.77	225.01	230.38	255.76
TS7'		-1764.57	85.81	225.26	230.5	255.72
L-Ala		45.5	220.05	226.7	249.15	310.32
D-Ala		45.5	220.05	226.7	249.15	310.32
C		V1	V2	V3	V4	V5
RC0		21.98	213.67	433.68	520.29	551.3
TS1		-1421.69	167.35	295.27	389.56	451.75
IM1		60.04	87.85	104.4	129.08	159.84
TS2		-1472.53	208.41	328.63	349.87	437.36
IM2		172.78	199.31	376.91	395.13	464.37
RC2		55.07	59.28	144.21	182.4	192.49
TS3		-1007.64	87.92	224.19	239.08	260.02
IM3		33.96	231.68	244.93	272.52	296.55
TS4		-1463.28	37.5	139.38	214.01	249.92
IM4		35.58	81.45	122.01	172.06	190.25
TS5		-689.8	61.48	198.9	238.24	296.36
IM5		36.91	72.24	151.08	181.77	196.61
TS6		-675.07	110.17	163.12	294.58	350.74
TS6'		-675.05	110.15	163.14	294.57	350.74
IM6		106.38	127.71	227.47	253.47	322.01
IM6'		106.38	127.71	227.47	253.47	322.01
RC6		25.22	67.38	108.13	132.23	190.12
TS7		-1000.76	95.8	179.14	216	249.67
TS7'		-1000.77	95.84	179.19	216.04	249.75
L-Ser		83.63	177.73	218.02	264.35	327.28
D-Ser		83.63	177.73	218.02	264.35	327.28
D		V1	V2	V3	V4	V5
RC0		211.31	224.59	395.92	553.86	789.14
TS1		-876.8	155.9	235.48	243.22	419.65
IM1		142.62	256.08	263.29	577.34	684.7
RC1		32.78	48.41	65.14	79.88	102.02
TS2		-1854.42	25.86	69.32	108.94	137.61
IM2		39.38	48.68	75.41	97.05	145.2
TS3		-404.32	46.58	85.4	160.29	193.9
IM3		65.26	98.04	112.18	182.98	206.23
TS4		-1929.72	46.2	86.62	179.74	192.71
IM4		58.49	88.53	118.33	183.91	249.2
TS5		-979.57	46.36	123.43	156.18	191.71
IM5		27.08	42.74	73.48	83.25	107.95
TS6		-1523.79	78.93	94.28	108.99	184.09
IM6		20.93	59.94	81.7	107.49	115.98
TS7		-1532.12	66.18	100.21	118.37	141.33
IM7		59.61	104.79	130.02	154.49	239.16
TS8		-445.04	30.26	70.55	98.33	116.23
IM8		32.23	52.7	66.6	85.01	126.42
TS9		-1806.97	46.22	85.73	107.64	128.93
TS9'		-1806.97	46.24	85.74	107.64	128.93
IM9		49.23	50.91	78.84	104.08	126.5
IM9'		47.73	50.58	79.08	103.49	126.5
TS10		-1057.27	72.63	120.56	218.6	243.29
TS10'		-1057.27	72.62	120.55	218.6	243.29
L-Isov		52.06	78.22	197.52	233.95	252.86
D-Isov		52.06	78.22	197.52	233.95	252.86
Without H
A		V1	V2	V3	V4	V5
RC0		21.65	52.82	64.18	119.15	147.59
TS1		-1708.72	82.85	199.16	203.38	231.56
IM1		38.62	67.44	77.37	90.04	167.02
TS2		-1857.14	263.59	289.32	347.14	438.18
IM2		80.63	101.99	126.96	175.27	198.35
TS3		-1238.54	69.22	133.5	158.06	258.47
Ala		32.52	234.15	239.34	272.77	296.66
B		V1	V2	V3	V4	V5
RC0		76.13	91.46	133.33	142.03	255.06
TS1		-1963.75	58.96	234.47	340.44	395.12
IM1		49.33	297.92	300.25	494.25	496.94
TS2		-1279.49	157.58	431.28	499.89	520.68
IM2		186.18	204.14	375.69	486.22	545.42
TS3		-1398.71	185.57	210.6	235.97	292.97
Ala		47.5	197.04	217.22	246.2	309.23
C		V1	V2	V3	V4	V5
RC0		32.28	44.69	99.46	129.66	164.31
TS1		-1082.38	94.93	103.85	187.22	254.11
IM1		66.99	79.22	145.06	166.54	200.16
TS2		-772.31	55.04	140.35	210.66	226.59
IM2		48.93	90.9	132.98	193.03	238.4
TS3		-1381.45	69.37	115.1	222.85	264.33
Ser		61.3	125.88	189.32	244.78	301.18
D		V1	V2	V3	V4	V5
RC0		24.31	40.33	46.78	93.5	100.63
TS1		-1673.05	49.16	78.58	125.35	168.51
IM1		18.36	29.83	59.61	66.67	93.86
TS2		-1077.34	93.03	142.18	170.95	198.26
IM2		46.71	82.32	168.2	225.7	233.15
TS3		-1988.14	60.74	67.74	105.1	171.19
IM3		15.7	45.6	55.82	130.01	147.27
TS4		-1190.49	83.34	100.35	123.59	163.99
IM4		32.33	41.75	85.72	87.7	121.29
TS5		-1343.05	64.18	101.05	191.3	201.72
Isov		24.22	104.51	195.94	215.89	230.55
